# Supplementary material for: Inhibition of GCN2 Alleviates Cardiomyopathy in Type 2 Diabetic Mice via Attenuating Lipotoxicity and Oxidative Stress
Source: MDPI journal article supplement (doi:10.3390/antiox11071379), 2022-07-16
Supplement: s1 [file s1]

## **Supplemental Files**

### **Inhibition of GCN2 alleviates cardiomyopathy in type 2 diabetic mice via attenuating lipotoxicity and oxidative stress**

Juntao Yuan<sup>#</sup>, Fang Li<sup>#</sup>, Bingqing Cui, Junling Gao, Zhuoran Yu, Zhongbing Lu<sup>\*</sup>

College of Life Science, University of Chinese Academy of Sciences, Beijing, 100049,  
China

Running Title: GCN2 inhibitor improves diabetic cardiomyopathy

<sup>#</sup> These authors contributed equally to this work.

<sup>\*</sup> Correspondence

Zhongbing Lu, PhD

E-mail: luzhongbing@ucas.ac.cn

College of Life Science, University of Chinese Academy of Sciences

19A Yuquanlu, Beijing, 100049, China

Fax: 86-10-69672630; Tel: 86-10-69672630

**Table S1. The quantitative real-time PCR primer information.**

| Genes name     | Accession      | Primers | Sequences (5'-3')             | Length (bp) |
|----------------|----------------|---------|-------------------------------|-------------|
| <i>Anp</i>     | NM_008725.3    | Forward | 5'- GGGGGTAGGATTGACAGGAT -3'  | 99          |
|                |                | Reverse | 5'- CAGAATCGACTGCCTTTTCC -3'  |             |
| <i>CD36</i>    | NM_001159555.1 | Forward | 5'-CCTGCAAATGTCAGAGGAAA-3'    | 92          |
|                |                | Reverse | 5'-GCGACATGATTAATGGCACA-3'    |             |
| <i>Ndufa8</i>  | NM_026703.3    | Forward | 5'- GCGGAGCCTTTCACAGAGTA-3'   | 228         |
|                |                | Reverse | 5'- AATCACAGGGTTGGGCTCTG-3'   |             |
| <i>Cidea</i>   | NM_007702.2    | Forward | 5'- AGAAGGTCCTACTGACCCCC -3'  | 266         |
|                |                | Reverse | 5'- ACCCGGTGTCCATTTCTGTC -3'  |             |
| <i>Ndufs6</i>  | NM_010888.2    | Forward | 5'- TCGGGGTTCAGTGTGCG-3'      | 211         |
|                |                | Reverse | 5'- TTATGTACACCTTGGGGTGGC-3'  |             |
| <i>ATP5d</i>   | NM_001347092.1 | Forward | 5'- AGTCAGAACTGTCAGGTGCG -3'  | 376         |
|                |                | Reverse | 5'- ACAGAACACTCAGTTGGTTCCT-3' |             |
| <i>Fasn</i>    | NM_007988.3    | Forward | 5'- CTCCACAGCTCTTCCAGTGAG -3' | 246         |
|                |                | Reverse | 5'- TCTCTAGAGGGCTTGACCA -3'   |             |
| <i>Bnp</i>     | NM_001287348.2 | Forward | 5'-CTGCTGGAGCTGATAAGAGA-3'    | 176         |
|                |                | Reverse | 5'-TGCCCAAAGCAGCTTGAGAT-3'    |             |
| <i>β-Mhc</i>   | NM_001361607.1 | Forward | 5'- GCTGCCCCATATATACAGCCC -3' | 265         |
|                |                | Reverse | 5'- GGAGCCACCTTGGAACACTT -3'  |             |
| <i>Srebp1c</i> | NM_001313979.1 | Forward | 5'- CTGTCTACCCCCAGCATAG -3'   | 119         |
|                |                | Reverse | 5'- GATGTGCGAACTGGACACAG -3'  |             |
| <i>Plin2</i>   | NM_001403711.1 | Forward | 5'- CTCGTCCCTCAGCTCTCCT -3'   | 347         |
|                |                | Reverse | 5'- TTGGCCACTCTCATCACCAC -3'  |             |
| <i>Plin4</i>   | NM_001372234.1 | Forward | 5'- TCTGAACAGACAGCTGGAGA-3'   | 120         |
|                |                | Reverse | 5'- CAGTCCACCCTGGACCATTG-3'   |             |
| <i>Actg1</i>   | NM_001313923.1 | Forward | 5'- TCGAACACGGCATTGTCACT-3'   | 163         |
|                |                | Reverse | 5'- GGAACAGAACCCCTGCGTCAT-3'  |             |
| <i>Pparγ</i>   | NM_001127330.2 | Forward | 5'- GCGGAAGAAGAGACCTGGG -3'   | 116         |

|                     |                |         |                               |     |
|---------------------|----------------|---------|-------------------------------|-----|
|                     |                | Reverse | 5'- GTGTGACTTCTCCTCAGCCC -3'  |     |
| <i>Scd1</i>         | NM_009127.4    | Forward | 5'- CGCTGGCACATCAACTTCAC-3'   | 162 |
|                     |                | Reverse | 5'- AGGAACTCAGAAGCCCAAAGC -3' |     |
| <i>ATP5gl</i>       | NM_001161419.1 | Forward | 5'-GGAGTGGGAGTGCAGATTGA-3'    | 296 |
|                     |                | Reverse | 5'-ACCAAACACTGTGCCAATGC-3'    |     |
| <i>Collagen I</i>   | NM_007742.4    | Forward | 5'- CACCCCAATCTGGTTCCTC -3'   | 333 |
|                     |                | Reverse | 5'- CATAAGCCAAGTGGGCAGGA -3'  |     |
| <i>Collagen III</i> | NM_009930.2    | Forward | 5'- GAGGAATGGGTGGCTATCCG-3'   | 316 |
|                     |                | Reverse | 5'- TTGCGTCCATCAAAGCCTCT-3'   |     |
| <i>Pde3a</i>        | NM_018779.2    | Forward | 5'-TCTGCAAGGCTGAACTTCG-3'     | 248 |
|                     |                | Reverse | 5'-CTCTCCAACAACAGCCGGAG-3'    |     |
| <i>Psmel</i>        | NM_011189.1    | Forward | 5'- TGGTCACTACCTGGTTGCAG-3'   | 140 |
|                     |                | Reverse | 5'- CTTGGAGATCTGCGTGTGGA-3'   |     |
| <i>Psmb3</i>        | NM_011971.4    | Forward | 5'- CTTCCACTCCAGCGCAATCA-3'   | 112 |
|                     |                | Reverse | 5'- CTGGATCCCGAAACGTCTG-3'    |     |
| <i>18S</i>          | NR_003278.3    | Forward | 5'-AGGAATTGACGGAAGGGCACCAC-3' | 327 |
|                     |                | Reverse | 5'-GTGCAGCCCCGGACATCTAAGG-3'  |     |

**Table S2. Cardiac function data for Oil and GCN2iB-treated type 2 diabetic mice.**

| Parameter   | Oil (Control) | GCN2iB (Treatment) |
|-------------|---------------|--------------------|
| LVAW;d (mm) | 0.85±0.06     | 0.95±0.05*         |
| LVAW;s (mm) | 1.16±0.05     | 1.49±0.09*         |
| LVID;d (mm) | 4.0±0.31      | 3.68±0.27          |
| LVID;s (mm) | 2.95±0.21     | 2.39±0.36*         |
| LVPW;d (mm) | 1.0±0.09      | 0.94±0.13          |
| LVPW;s (mm) | 1.17±0.03     | 1.41±0.12*         |
| EF (%)      | 52.26±4.14    | 70.41±4.70**       |
| FS (%)      | 26.46±2.66    | 39.14±3.88**       |

LVAW;d: Left ventricular end-diastolic anterior wall thickness, LVAW;s: Left ventricular end-systolic anterior wall thickness; LVID;d: Left ventricular cavity diastolic dimension; LVID;s: left ventricular end-systolic internal diameter; LVPW;d: Left ventricular end-diastolic posterior wall thickness; LVAW;s: Left ventricular end-systolic anterior wall thickness; EF: Ejection fraction; FS: fractional shortening; N=5, Data are mean  $\pm$  SD. \* indicates  $p<0.05$ , \*\* indicates  $p<0.01$ .

**Table S3. Cardiac function data for Oil and GCN2iB-treated db/db mice.**

| Parameter   | Oil (Control)    | GCN2iB (Treatment) |
|-------------|------------------|--------------------|
| LVAW;d (mm) | 0.90 $\pm$ 0.04  | 1.06 $\pm$ 0.03*   |
| LVAW;s (mm) | 1.40 $\pm$ 0.15  | 1.55 $\pm$ 0.13    |
| LVID;d (mm) | 3.92 $\pm$ 0.14  | 3.57 $\pm$ 0.09*   |
| LVID;s (mm) | 2.95 $\pm$ 0.13  | 1.70 $\pm$ 0.20*   |
| LVPW;d (mm) | 0.98 $\pm$ 0.08  | 0.99 $\pm$ 0.10    |
| LVPW;s (mm) | 1.51 $\pm$ 0.07  | 1.74 $\pm$ 0.10*   |
| EF (%)      | 73.43 $\pm$ 2.99 | 84.05 $\pm$ 4.99*  |
| FS (%)      | 41.91 $\pm$ 2.25 | 52.32 $\pm$ 5.62*  |

N=5, Data are mean  $\pm$  SD. \* indicates  $p<0.05$ , \*\* indicates  $p<0.01$ .
